# Supplementary material
Source: PubMed Central journal article supplement (PMC9081130)

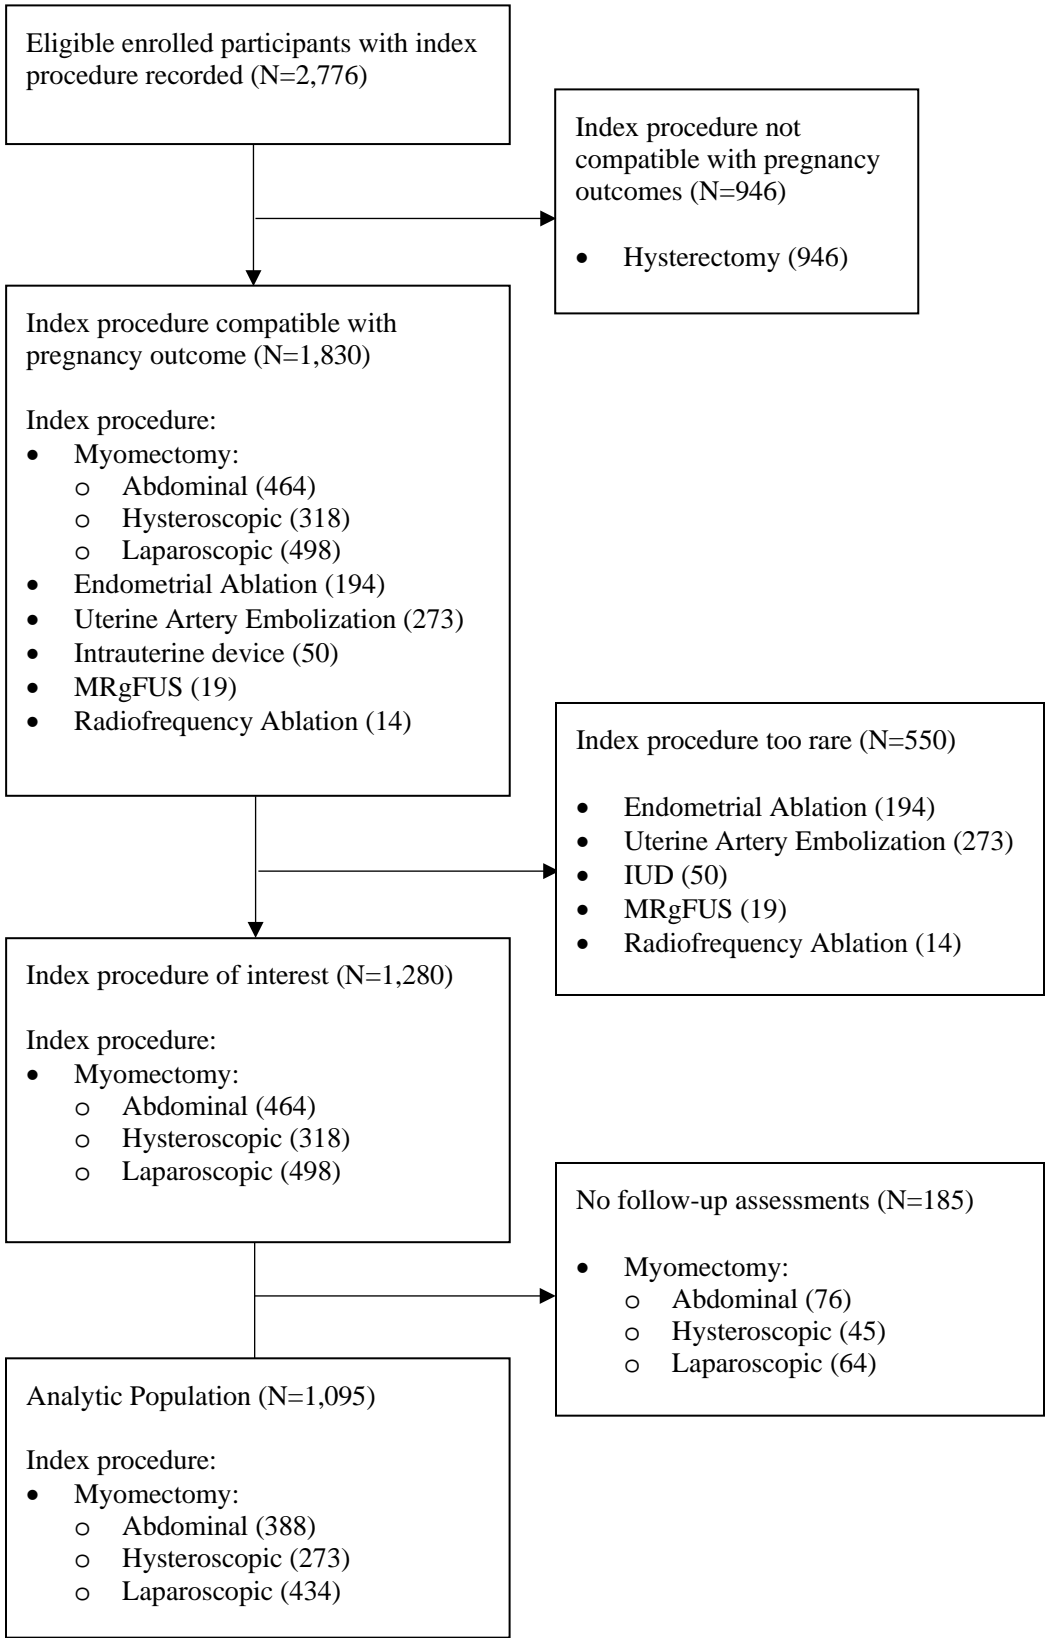

Supplement: NIHMS1783349-supplement-1.pdf [file NIHMS1783349-supplement-1.pdf]
